# Supplementary material for: A Systems Biology-Based Gene Expression Classifier of Glioblastoma Predicts Survival with Solid Tumors
Source: PubMed Central journal article supplement (PMC2707631; doi:10.1371/journal.pone.0006274), 2009-07-17

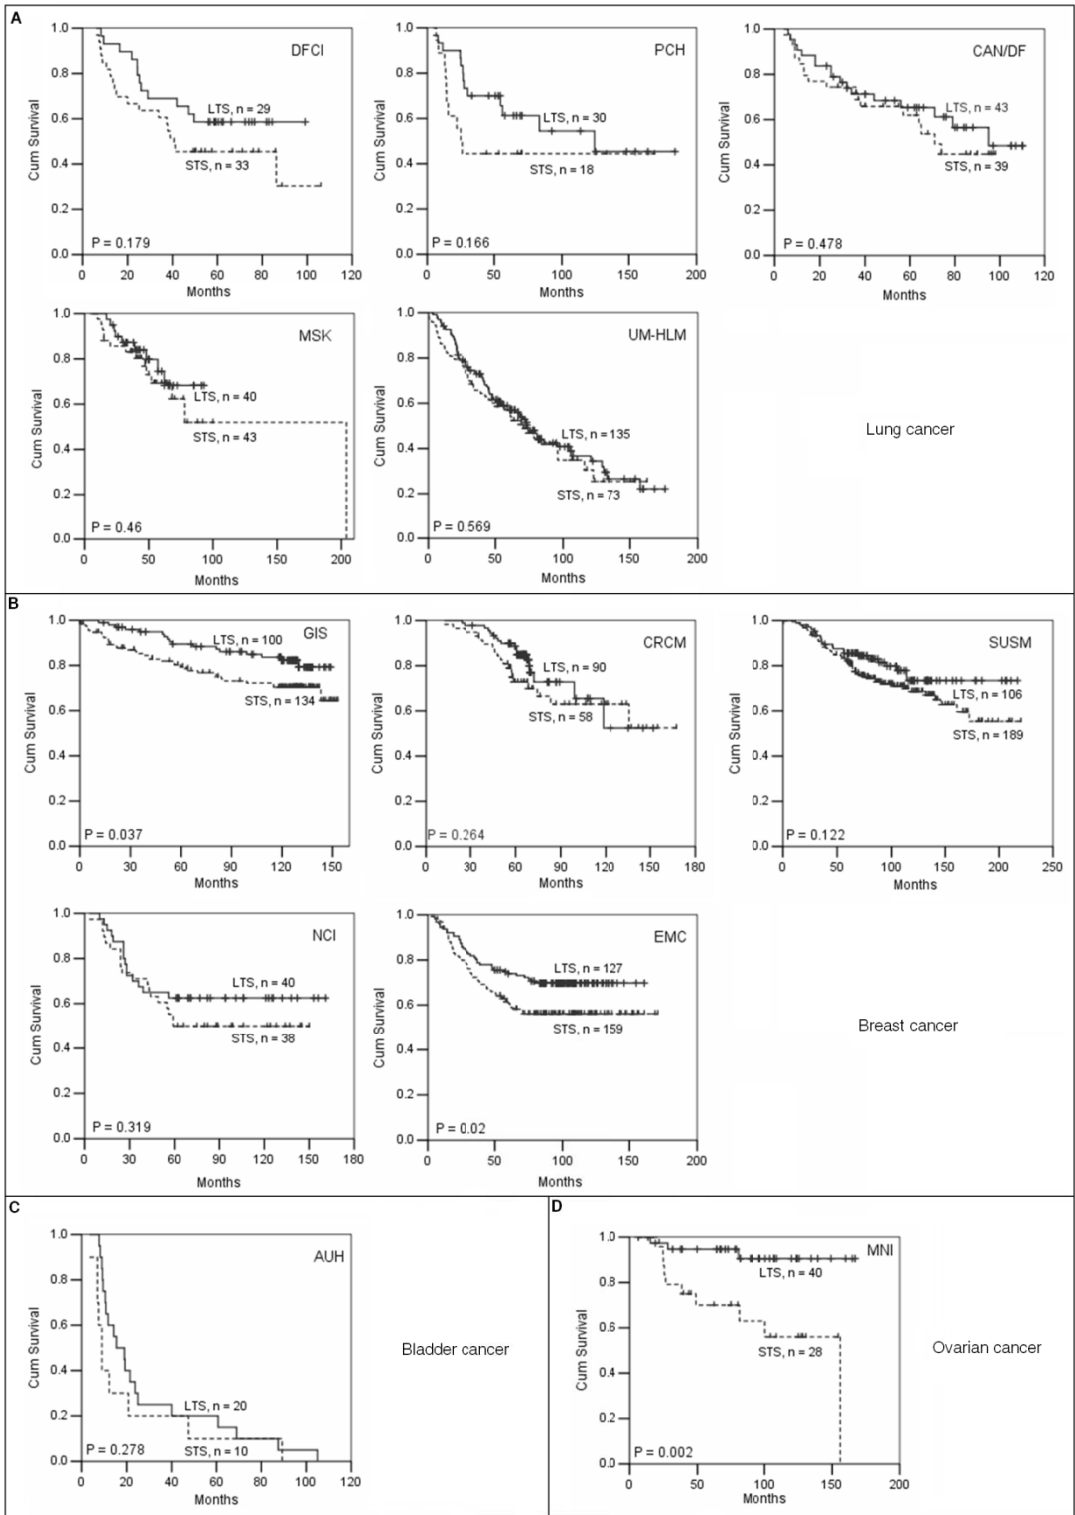

Supplement: pone.0006274.s003.pdf [file pone.0006274.s003.pdf]
