# Supplementary material for: A Systems Biology-Based Gene Expression Classifier of Glioblastoma Predicts Survival with Solid Tumors
Source: PubMed Central journal article supplement (PMC2707631; doi:10.1371/journal.pone.0006274), 2009-07-17
Supplement: pone.0006274.s010.pdf [file pone.0006274.s010.pdf]

**Table S4** . List of candidate survival-associated genes developed by method A from primary GBM data in UCLA.

| Gene Symbol | Score  | Gene Symbol | Score  | Gene Symbol | Score  | Gene Symbol | Score  |
|-------------|--------|-------------|--------|-------------|--------|-------------|--------|
| NOTCH2      | 0.0001 | ETS1        | 0.0089 | PTPRU       | 0.0213 | JUN         | 0.0381 |
| PLCB1       | 0.0001 | SKI         | 0.0091 | ZAP70       | 0.0216 | RRAS2       | 0.0381 |
| PARD3       | 0.0002 | CDC14B      | 0.0092 | CCNB1       | 0.0217 | FZD7        | 0.0384 |
| MAPK4       | 0.0003 | NFYC        | 0.0095 | TCF1        | 0.0219 | EMR1        | 0.0391 |
| JUND        | 0.0005 | ASCL1       | 0.0095 | IL13RA2     | 0.0219 | RPS5        | 0.0391 |
| ADK         | 0.0006 | BMPR1A      | 0.0098 | PTPN6       | 0.0223 | RBPSUH      | 0.0392 |
| CRKL        | 0.0006 | GAB1        | 0.01   | TUBG1       | 0.0225 | EIF4B       | 0.0402 |
| CALCRL      | 0.001  | CDC42       | 0.01   | PHF11       | 0.0227 | PLK1        | 0.0403 |
| ARRB2       | 0.001  | DAPK1       | 0.0103 | SOS1        | 0.0227 | JAG1        | 0.0405 |
| GGH         | 0.0013 | CAPZA1      | 0.0105 | FZD8        | 0.0234 | NCOR1       | 0.0405 |
| IRS1        | 0.0016 | HES1        | 0.0108 | GCH1        | 0.0234 | RPL28       | 0.0408 |
| NOTCH1      | 0.0017 | CCNE1       | 0.0109 | PDGFRA      | 0.0236 | FHL1        | 0.0411 |
| FKBP1A      | 0.0017 | RPS6KB2     | 0.0111 | CCNE2       | 0.0238 | GNA12       | 0.0413 |
| HDAC5       | 0.0018 | EIF3S10     | 0.0113 | PRKD1       | 0.024  | PLCG2       | 0.0415 |
| RAF1        | 0.003  | TMSB10      | 0.0115 | RAC3        | 0.0243 | PTGS1       | 0.0415 |
| RPS6KA4     | 0.0034 | CHP         | 0.0115 | GNB1        | 0.0243 | FADD        | 0.0416 |
| LDHA        | 0.0035 | KRT19       | 0.0121 | GLP2R       | 0.0244 | ACVR1       | 0.0416 |
| SH3BGRL     | 0.0036 | CTCF        | 0.0126 | CNTN1       | 0.0251 | RELA        | 0.0417 |
| PTPN11      | 0.0037 | PEA15       | 0.0126 | PPP2CA      | 0.0252 | GUCY2D      | 0.0419 |
| MAPK10      | 0.0046 | GAB2        | 0.0129 | DNAH9       | 0.026  | STK11       | 0.0423 |
| GATA1       | 0.0046 | PITX2       | 0.0131 | GLP1R       | 0.0261 | INPP5D      | 0.0423 |
| MAP4K5      | 0.005  | GATA4       | 0.0134 | PLA2G2A     | 0.0265 | CEBPB       | 0.0424 |
| COPS5       | 0.0051 | TCF8        | 0.0142 | PAK2        | 0.0279 | PAFAH1B1    | 0.0432 |
| PPP3CA      | 0.0054 | PCAF        | 0.0143 | JAG2        | 0.0294 | MAPK8       | 0.0435 |
| MT1H        | 0.0055 | ESR1        | 0.0149 | RAC2        | 0.0307 | PLD2        | 0.044  |
| MAP3K2      | 0.006  | PTHR1       | 0.0151 | TRIP10      | 0.031  | VAV1        | 0.0451 |
| SNX4        | 0.006  | GRB2        | 0.0152 | ORC6L       | 0.0325 | TIAM1       | 0.0457 |
| HCK         | 0.0066 | PRKCD       | 0.0153 | PFDN4       | 0.0327 | CDC45L      | 0.0459 |
| PIK3CB      | 0.0068 | PRKCG       | 0.0153 | NOTCH3      | 0.0328 | CRK         | 0.0459 |
| RPS6KA3     | 0.0069 | SOCS3       | 0.0154 | ITPR3       | 0.033  | GADD45G     | 0.0462 |
| STK17B      | 0.0071 | PRPS1       | 0.0156 | BAX         | 0.0332 | CALM3       | 0.0463 |
| MT1G        | 0.0071 | MAML1       | 0.0175 | FOS         | 0.0332 | ZFHX1B      | 0.0464 |
| PRKCE       | 0.0072 | FRAP1       | 0.0175 | RAB26       | 0.0337 | NUDT4       | 0.0465 |
| TNFRSF1A    | 0.0078 | IL3RA       | 0.0176 | TCF12       | 0.0341 | MCM6        | 0.0467 |
| TYMS        | 0.008  | BDH         | 0.0176 | TGFBRAP1    | 0.035  | PTK2        | 0.0468 |
| ITPR1       | 0.008  | PRKAR2A     | 0.0178 | PRKAR1A     | 0.0351 | ABL1        | 0.0479 |
| TSC2        | 0.0081 | RAB9A       | 0.0183 | RBX1        | 0.0362 | IFNGR1      | 0.0482 |
| DHFR        | 0.0084 | STAT2       | 0.0187 | MAP2K2      | 0.0363 | ZNF318      | 0.0483 |
| S100B       | 0.0084 | FOXO3A      | 0.0191 | GDI2        | 0.0367 | NCK2        | 0.0489 |
| HDAC4       | 0.0088 | TYK2        | 0.0196 | TEC         | 0.037  | IFNAR2      | 0.0495 |
| CAMK2G      | 0.0474 | SYK         | 0.0198 | S100A1      | 0.0373 | PTTG3       | 0.05   |
