# Supplementary material for: A Systems Biology-Based Gene Expression Classifier of Glioblastoma Predicts Survival with Solid Tumors
Source: PubMed Central journal article supplement (PMC2707631; doi:10.1371/journal.pone.0006274), 2009-07-17
Supplement: pone.0006274.s011.pdf [file pone.0006274.s011.pdf]

**Table S5.** List of candidate survival-associated genes developed by method A from primary GBM data in UCSF-1.

| Gene Symbol | Score  | Gene Symbol | Score  | Gene Symbol | Score  | Gene Symbol | Score  |
|-------------|--------|-------------|--------|-------------|--------|-------------|--------|
| NEFL        | 0      | CKS1B       | 0.006  | MAT1A       | 0.014  | CASP6       | 0.0234 |
| MAP2K4      | 0.0002 | ATP6V1C1    | 0.0062 | TRIP10      | 0.0141 | GABRA2      | 0.024  |
| RGS11       | 0.0003 | CYCS        | 0.0062 | HMGB2       | 0.0143 | RRM2        | 0.0242 |
| AP1S2       | 0.0005 | ATP6V0C     | 0.0063 | ATP6V1H     | 0.0143 | CYP51A1     | 0.0242 |
| NF1         | 0.0005 | DUSP4       | 0.0063 | GPI         | 0.0144 | PSMD8       | 0.0243 |
| HRAS        | 0.0006 | DNMT1       | 0.007  | ETF1        | 0.0147 | UNG         | 0.0246 |
| PRKAR2B     | 0.0007 | BCKDK       | 0.0073 | ID4         | 0.015  | ARF4        | 0.0246 |
| CFLAR       | 0.0009 | MAPK8IP2    | 0.0073 | EIF3S6      | 0.0151 | CYC1        | 0.0253 |
| CTSS        | 0.001  | RRAS        | 0.0073 | AKAP4       | 0.0151 | DHFR        | 0.0254 |
| CACNB1      | 0.0014 | CDKN1B      | 0.0076 | TRAF1       | 0.0155 | DTYMK       | 0.0261 |
| MAD2L1      | 0.0015 | CASP2       | 0.0076 | RPA3        | 0.0158 | PDE6C       | 0.0262 |
| MAPK8IP3    | 0.0017 | CAMK2A      | 0.0077 | SPTAN1      | 0.0162 | KRT14       | 0.0274 |
| POLD2       | 0.0018 | SKP2        | 0.0079 | PDK1        | 0.0163 | ALDH2       | 0.0278 |
| EIF2B5      | 0.0019 | CCT2        | 0.008  | ID3         | 0.0165 | FBP2        | 0.0282 |
| MAPK8IP1    | 0.0021 | FLT1        | 0.0081 | TK1         | 0.0165 | AKAP6       | 0.0284 |
| GRIN1       | 0.0023 | PTTG1       | 0.0083 | MXI1        | 0.0176 | RPA2        | 0.0288 |
| GGH         | 0.0025 | MAFK        | 0.0087 | CDC6        | 0.0176 | ALDH1A1     | 0.0289 |
| HDAC2       | 0.0026 | BIRC3       | 0.0088 | TYMS        | 0.0178 | CDKN2C      | 0.0291 |
| PPARG       | 0.0027 | CYP1A1      | 0.009  | PHKG2       | 0.0179 | CUL4A       | 0.0308 |
| PRKAR2A     | 0.0028 | EIF2S1      | 0.0091 | CDC23       | 0.0179 | CDC2        | 0.0311 |
| ADH1B       | 0.0028 | DGAT1       | 0.0094 | ID2         | 0.018  | ARHGAP4     | 0.0313 |
| CDC20       | 0.0029 | CDKN1A      | 0.0094 | HSPA1L      | 0.0183 | MARS        | 0.0315 |
| PICALM      | 0.003  | RASA1       | 0.0095 | TUBB4       | 0.0185 | PAX5        | 0.0321 |
| MAP2K7      | 0.0031 | NR2F1       | 0.0098 | PPP3CA      | 0.0188 | FAT         | 0.0322 |
| GRIN2D      | 0.0031 | MAPK11      | 0.0099 | ARHGAP6     | 0.0192 | EEF1A1      | 0.0324 |
| RAG1        | 0.0036 | EIF2S2      | 0.0101 | UMPS        | 0.0192 | PIN1        | 0.0327 |
| CABIN1      | 0.0038 | PSEN2       | 0.0102 | SKIP        | 0.0199 | GPRC5B      | 0.0331 |
| PRKCH       | 0.0038 | PGK1        | 0.0103 | CDH16       | 0.02   | SNAP25      | 0.0334 |
| POLA        | 0.004  | NRAS        | 0.0106 | PPARBP      | 0.0204 | ATF5        | 0.0336 |
| BMP4        | 0.004  | NSF         | 0.0111 | CDC16       | 0.0205 | AMPH        | 0.0337 |
| CDH18       | 0.0041 | VAMP2       | 0.0112 | MOG         | 0.0205 | NDP         | 0.0343 |
| ENDOG       | 0.0046 | RRM1        | 0.0114 | CACNA1A     | 0.021  | CCNA2       | 0.0346 |
| ARNT        | 0.0048 | PDGFB       | 0.0116 | NDST2       | 0.0212 | ADAM2       | 0.0348 |
| CASP10      | 0.0048 | ELA2A       | 0.0119 | CRADD       | 0.0215 | PDE4D       | 0.035  |
| CCNB2       | 0.0049 | DES         | 0.0124 | CDH1        | 0.0219 | BCL2L1      | 0.0359 |
| GABARAP     | 0.005  | ATP6V1G2    | 0.0124 | RB1         | 0.022  | HDAC4       | 0.036  |
| CDK2        | 0.005  | RPS6KA3     | 0.0125 | GNGT1       | 0.0226 | PLA2G6      | 0.036  |
| GLA         | 0.0054 | SLC9A3R1    | 0.0131 | PCNA        | 0.0227 | FDX1        | 0.0361 |
| PTMA        | 0.0057 | GRM3        | 0.0132 | PDE6H       | 0.0228 | CAMK2G      | 0.0461 |
| PDCD8       | 0.0059 | HDAC6       | 0.0132 | CDC7        | 0.0229 | MCM6        | 0.0484 |
| AHCY        | 0.006  | AKAP9       | 0.0132 | ALPI        | 0.023  | MUSK        | 0.0493 |
| ADD1        | 0.037  | NTSR1       | 0.0389 | TGFB1       | 0.0426 | EEF1A2      | 0.0492 |
| CDKN2A      | 0.0373 | MCL1        | 0.0389 | HES1        | 0.043  | GNAL        | 0.0468 |
| BUB1B       | 0.0375 | AKAP5       | 0.0391 | PTTG2       | 0.043  | CREB1       | 0.0426 |
| EIF2B2      | 0.0377 | MMP7        | 0.0394 | CHGB        | 0.0436 | POLE        | 0.0389 |
| ASK         | 0.0378 | MAP1B       | 0.0395 | PPP1R1A     | 0.0436 | TERF2IP     | 0.0468 |
| PTN         | 0.0379 | TBXAS1      | 0.0399 | EIF3S2      | 0.0451 | HK2         | 0.0426 |
| CDC45L      | 0.0379 | RBL1        | 0.0413 | BID         | 0.0453 | PSMB8       | 0.0478 |
| RPA1        | 0.038  | WEE1        | 0.0425 | BAD         | 0.0458 | THRA        | 0.05   |
| IL11        | 0.0381 | BIN1        | 0.0426 |             |        |             |        |
