# Supplementary material for: A Systems Biology-Based Gene Expression Classifier of Glioblastoma Predicts Survival with Solid Tumors
Source: PubMed Central journal article supplement (PMC2707631; doi:10.1371/journal.pone.0006274), 2009-07-17
Supplement: pone.0006274.s012.pdf [file pone.0006274.s012.pdf]

**Table S6.** List of candidate survival-associated genes developed by method A from primary GBM data in MDA.

| Gene Symbol | Score  | Gene Symbol | Score  | Gene Symbol | Score  | Gene Symbol | Score  |
|-------------|--------|-------------|--------|-------------|--------|-------------|--------|
| POLL        | 0.0001 | FCER1G      | 0.0072 | ESPL1       | 0.0196 | TLR7        | 0.0369 |
| PTHLH       | 0.0004 | CCNA1       | 0.0073 | RBL2        | 0.0196 | CCL4        | 0.0371 |
| KRT15       | 0.0007 | RRM1        | 0.0075 | TP53        | 0.0196 | PECAM1      | 0.0371 |
| BTG3        | 0.0007 | POLE        | 0.0077 | HPRT1       | 0.0201 | ADD1        | 0.0378 |
| POLD2       | 0.0007 | MYBL2       | 0.0077 | RRM2        | 0.0204 | FOLR1       | 0.0378 |
| WEE1        | 0.0008 | ORC4L       | 0.0078 | CDH1        | 0.0207 | CR2         | 0.038  |
| CHEK2       | 0.001  | SKP2        | 0.0084 | DLG7        | 0.0209 | TRIP10      | 0.0381 |
| BRIP1       | 0.0016 | YY1         | 0.0085 | CCNH        | 0.021  | CSK         | 0.0381 |
| CCR1        | 0.0017 | DNMT3B      | 0.0088 | CDC2        | 0.0211 | EYA4        | 0.0385 |
| RAD51C      | 0.0019 | RFC1        | 0.0088 | CCL2        | 0.0214 | RPA4        | 0.0393 |
| CR1         | 0.0019 | HIST1H1B    | 0.0089 | POLD3       | 0.0214 | NXT1        | 0.0403 |
| CCNA2       | 0.0019 | ORC5L       | 0.009  | DNM1        | 0.0218 | MCM7        | 0.0403 |
| CKS1B       | 0.002  | GNB5        | 0.009  | BTK         | 0.0219 | DUSP3       | 0.0405 |
| GMNN        | 0.002  | CD79A       | 0.0091 | TRRAP       | 0.022  | E2F6        | 0.0406 |
| CCNB2       | 0.002  | MITF        | 0.0094 | PTPRC       | 0.0227 | HDAC1       | 0.0412 |
| RAD51L3     | 0.0021 | MCM5        | 0.0094 | SMC1L1      | 0.0229 | PMS1        | 0.0413 |
| SSTR2       | 0.0021 | MCM3        | 0.0096 | SHMT1       | 0.0231 | CDC25C      | 0.0414 |
| CDT1        | 0.0021 | CDK7        | 0.0097 | ITM2B       | 0.0232 | KIF2C       | 0.0415 |
| MCM4        | 0.0022 | CTPS        | 0.0099 | CRADD       | 0.0233 | ARHGDI3     | 0.0417 |
| CDC5L       | 0.0023 | HDAC2       | 0.01   | DCTD        | 0.0236 | CBL         | 0.0422 |
| CDK3        | 0.0024 | CRYAB       | 0.01   | FAT         | 0.0237 | WTAP        | 0.0431 |
| IFNA1       | 0.0024 | DNMT1       | 0.01   | CDKN2A      | 0.0238 | LY96        | 0.0432 |
| CDC7        | 0.0024 | AK2         | 0.01   | CDK4        | 0.024  | CASP2       | 0.0437 |
| FLJ14001    | 0.0025 | ORC6L       | 0.0101 | IFNGR1      | 0.0241 | RAG1        | 0.0442 |
| ASK         | 0.0026 | PCNA        | 0.0101 | UBE1        | 0.0242 | DNAJA1      | 0.0444 |
| UNG         | 0.0027 | TYK2        | 0.0106 | PTPRU       | 0.0247 | IRF1        | 0.0446 |
| TFIP11      | 0.0028 | PLCG2       | 0.0106 | MYD88       | 0.0247 | ANXA8       | 0.0449 |
| BRC A2      | 0.003  | SERPINA3    | 0.0107 | TNFRSF8     | 0.0248 | RXR A       | 0.0455 |
| RUVBL2      | 0.0031 | CD19        | 0.0109 | KRT14       | 0.0249 | ITPR2       | 0.0457 |
| ORC1L       | 0.0031 | PTAFR       | 0.0109 | CD72        | 0.025  | TRAF6       | 0.0457 |
| TFDP2       | 0.0032 | PSEN2       | 0.011  | FH          | 0.0252 | CXCR4       | 0.0461 |
| RPA3        | 0.0032 | HUS1        | 0.0111 | ORC3L       | 0.0253 | ITGB2       | 0.0461 |
| CDC6        | 0.0032 | RBL1        | 0.0111 | GPR30       | 0.0254 | NFKBIL1     | 0.0469 |
| CSF2RB      | 0.0033 | PAWR        | 0.0113 | GMPS        | 0.0256 | C3          | 0.0469 |
| CDC45L      | 0.0033 | EEF1A1      | 0.0115 | ICAM1       | 0.0256 | S100A7      | 0.0471 |
| TIMP3       | 0.0034 | POLA        | 0.012  | GJA1        | 0.0266 | TOP2B       | 0.0487 |
| MCM10       | 0.0037 | TNFRSF1A    | 0.012  | APEX1       | 0.0269 | CAMK2G      | 0.049  |
| XRCC3       | 0.0038 | RFC2        | 0.0122 | BRCA1       | 0.0276 | FOXO3A      | 0.0494 |
| CIRBP       | 0.0039 | TACSTD2     | 0.0122 | POLR2D      | 0.0278 | POLQ        | 0.0498 |
| POLR2B      | 0.0039 | E2F1        | 0.0124 | DHFR        | 0.0279 | PTPN6       | 0.0195 |
| MCM6        | 0.0039 | VCL         | 0.0128 | RAD51L1     | 0.028  | CCNB1       | 0.0189 |
| POLR2K      | 0.004  | KLK7        | 0.0128 | CD14        | 0.0281 | TYMS        | 0.0189 |
| IFITM1      | 0.0041 | KNTC1       | 0.0129 | OSM         | 0.0282 | RAD17       | 0.019  |
| RAD51       | 0.0041 | ATM         | 0.013  | PTTG1       | 0.0284 | ISGF3G      | 0.0191 |
| FEN1        | 0.0042 | MSH2        | 0.0132 | PRIM1       | 0.0293 | EPN1        | 0.0192 |
| RB1         | 0.0042 | RFC4        | 0.0135 | TEC         | 0.03   | PTPN11      | 0.0194 |
| MCM2        | 0.0042 | PRTN3       | 0.0135 | H1FO        | 0.0303 | PMS2        | 0.0182 |
| ORC2L       | 0.0043 | CCNE2       | 0.0136 | SHMT2       | 0.0306 | RAC1        | 0.0183 |
| CDKN3       | 0.0044 | CDC25A      | 0.0142 | BIRC5       | 0.031  | CCR3        | 0.0184 |
| NFKB2       | 0.0045 | DAPP1       | 0.0142 | CCT2        | 0.0313 | BRD2        | 0.0186 |
| POLA2       | 0.0045 | CDK6        | 0.0149 | BUB1        | 0.0313 | PIN1        | 0.007  |
| WRN         | 0.0045 | FANCE       | 0.015  | LRP2        | 0.032  | EXO1        | 0.0066 |
| WT1         | 0.0045 | DNMT3A      | 0.0152 | RPS6KA1     | 0.0325 | FCGR2B      | 0.0179 |
| CDK2        | 0.0046 | DUSP12      | 0.0154 | RAF1        | 0.0327 | POLD1       | 0.0064 |
| CYP3A5      | 0.0046 | SYK         | 0.0154 | TNFRSF1B    | 0.0334 | MSH6        | 0.0177 |
| ITPKB       | 0.0049 | CREBBP      | 0.0156 | PTK2B       | 0.0335 | RPA2        | 0.0062 |
| RAC2        | 0.0049 | SSTR1       | 0.0158 | IFNAR2      | 0.0336 | CDKN1A      | 0.0177 |
| RFC5        | 0.0051 | CSF1        | 0.0161 | GJB1        | 0.034  | TOB2        | 0.0176 |
| RPA1        | 0.0052 | HLA-DRB1    | 0.0168 | ITPKA       | 0.0344 | RUVBL1      | 0.0061 |
| BLM         | 0.0052 | HLA-DRA     | 0.0168 | FANCF       | 0.0348 | CD79B       | 0.0176 |
| DAXX        | 0.0053 | LATS1       | 0.0172 | TLK1        | 0.035  | ATR         | 0.0365 |
| CCR5        | 0.0055 | DNAJC7      | 0.0173 | GNAQ        | 0.0353 | PTMA        | 0.006  |
| MUTYH       | 0.0055 | PLK1        | 0.0173 | FANCG       | 0.0357 | FCER1A      | 0.0364 |
| TUBG1       | 0.0055 | TFDP1       | 0.0175 | PML         | 0.0364 | EDG1        | 0.0176 |
| PITX2       | 0.0058 |             |        |             |        |             |        |
