# Supplementary material for: A Systems Biology-Based Gene Expression Classifier of Glioblastoma Predicts Survival with Solid Tumors
Source: PubMed Central journal article supplement (PMC2707631; doi:10.1371/journal.pone.0006274), 2009-07-17
Supplement: pone.0006274.s013.pdf [file pone.0006274.s013.pdf]

**Table S7.** List of candidate survival-associated genes developed by method B from primary GBM data in UCLA.

| Gene Symbol | Score | Gene Symbol | Score | Gene Symbol | Score | Gene Symbol | Score |
|-------------|-------|-------------|-------|-------------|-------|-------------|-------|
| SSR1        | 0     | ARGBP2      | 0.02  | CART1       | 0     | GPS2        | 0     |
| MGC5306     | 0     | CD19        | 0     | GTF2I       | 0.03  | FLJ21945    | 0.03  |
| INSR        | 0.02  | DNM1        | 0.01  | MUC1        | 0.01  | ADRBK1      | 0.05  |
| LRP1        | 0     | TYK2        | 0     | CALM1       | 0     | SHC3        | 0.02  |
| PRKCA       | 0.05  | JUNB        | 0     | CBL         | 0.05  | POU3F1      | 0.03  |
| AR          | 0.04  | JUND        | 0     | GDNF        | 0.02  | POU3F4      | 0.01  |
| ATF2        | 0.01  | TUBA1       | 0.03  | CALR        | 0     | SOD2        | 0     |
| JUN         | 0.06  | CREM        | 0.01  | RXRB        | 0.01  | HDHD3       | 0     |
| MYC         | 0.01  | RELA        | 0.05  | CDK5        | 0     | LMO4        | 0.02  |
| YWHAE       | 0.01  | TAF7L       | 0.01  | DNMT2       | 0.05  | MPHOSPH6    | 0     |
| MCP         | 0.01  | TITF1       | 0.02  | POLA2       | 0.04  | COX17       | 0     |
| SYK         | 0.05  | CDK5RAP3    | 0.01  | TGFBR1      | 0     | TMPRSS3     | 0.03  |
| ZFP64       | 0.01  | MAP3K8      | 0.02  | NPPB        | 0     | SKI         | 0.05  |
| TERT        | 0     | ATN1        | 0     | BACH        | 0.03  | SMG1        | 0     |
| LARP1       | 0.04  | KIAA0913    | 0.01  | RGS3        | 0.05  | PHYH        | 0     |
| PTPN6       | 0.01  | HRB         | 0.01  | CASP3       | 0.02  | ZBTB25      | 0.03  |
| GNA13       | 0.04  | CD79B       | 0     | NOL3        | 0.04  | SCAM-1      | 0.01  |
| KLRA1       | 0.02  | ITPR1       | 0.02  | ETNK2       | 0     | IMMT        | 0.02  |
| LMO7        | 0.02  | TOM1L1      | 0.03  | PPL         | 0     | IKBKE       | 0.01  |
| PDLIM4      | 0     | MAP2K6      | 0.05  | TFAM        | 0.04  | ANKRD12     | 0     |
| CDH7        | 0     | SRF         | 0.02  | RAD23A      | 0.01  | CORO2B      | 0     |
| MET         | 0.02  | BID         | 0.03  | EPHA7       | 0.01  | PSG9        | 0.04  |
| TSC2        | 0     | SMARCA4     | 0     | KCNJ4       | 0.03  | TFE3        | 0.02  |
| SRRM2       | 0     | SMARCC1     | 0     | S100B       | 0.01  | CEBPG       | 0.03  |
| BIRC4       | 0.04  | ELK1        | 0     | MDFI        | 0.05  | UBB         | 0.04  |
| ATF1        | 0.03  | GAB1        | 0.01  | ZNF646      | 0.03  | NRGN        | 0     |
| CREBBP      | 0.05  | CRKL        | 0     | WNT1        | 0.01  | PLCG1       | 0     |
| RBPSUH      | 0.04  | PTPRC       | 0.04  | CHD8        | 0     | CNOT7       | 0.01  |
| SMAD4       | 0     | BCL6        | 0.02  | FAM60A      | 0.02  | EFEMP2      | 0     |
| HCK         | 0.02  | MAPK1       | 0.01  | LRPAP1      | 0.02  | GTPBP3      | 0     |
| IL5RA       | 0.03  | FGF2        | 0.04  | MDK         | 0.04  | ERBB4       | 0.04  |
| VSNL1       | 0.02  | CTDP1       | 0     | GPRASP1     | 0.01  | KRT18       | 0.05  |
| CD40        | 0.05  | MN1         | 0.03  | RTN4        | 0.04  | R3HDM       | 0.02  |
| RLBP1       | 0.03  |             |       |             |       |             |       |
