# Supplementary material for: A Systems Biology-Based Gene Expression Classifier of Glioblastoma Predicts Survival with Solid Tumors
Source: PubMed Central journal article supplement (PMC2707631; doi:10.1371/journal.pone.0006274), 2009-07-17
Supplement: pone.0006274.s014.pdf [file pone.0006274.s014.pdf]

**Table S8.** List of candidate survival-associated genes developed by method B from primary GBM data in UCSF-1.

| Gene Symbol | Score | Gene Symbol | Score | Gene Symbol | Score | Gene Symbol | Score |
|-------------|-------|-------------|-------|-------------|-------|-------------|-------|
| CBX7        | 0.02  | EPHB4       | 0.03  | PTOV1       | 0.04  | NCBP1       | 0.01  |
| HCK         | 0.04  | PECAM1      | 0.05  | CHD8        | 0.2   | RRM2        | 0.02  |
| IGF1R       | 0.02  | ERF         | 0.02  | NID1        | 0.03  | ICMT        | 0.02  |
| IRAK1       | 0.02  | RRAS        | 0.03  | CHPF        | 0.01  | CNN3        | 0.02  |
| JUN         | 0.01  | GRIN1       | 0     | VDP         | 0.03  | IFNAR1      | 0     |
| PLCG1       | 0.03  | CDK2        | 0     | YKT6        | 0     | BMP4        | 0     |
| ROBO1       | 0.01  | GSPT1       | 0.03  | RGS16       | 0.05  | ACTB        | 0.04  |
| CCND2       | 0.02  | SHH         | 0.05  | RPS6KA5     | 0     | CEBPG       | 0     |
| MDM2        | 0.02  | ATP1A3      | 0.05  | GRAP2       | 0.2   | IL13RA2     | 0     |
| NDEL1       | 0.04  | GDI1        | 0.01  | ITGB2       | 0.01  | NFKB2       | 0.01  |
| CREBBP      | 0.05  | VAMP2       | 0     | SH3BP2      | 0     | GLG1        | 0.04  |
| STAT1       | 0.02  | KIAA1128    | 0     | SYK         | 0.05  | UPF2        | 0     |
| ACTA1       | 0.03  | NFKBIE      | 0     | EPB41L3     | 0.01  | GPRASP1     | 0.04  |
| VIM         | 0.02  | SH3GL3      | 0.02  | CR2         | 0.01  | DOCK3       | 0     |
| AR          | 0.02  | CDC25B      | 0.05  | LAMA4       | 0     | ATP4B       | 0.02  |
| EP300       | 0.02  | IFRD1       | 0.04  | S100A4      | 0.04  | MAPK10      | 0.04  |
| UBE2I       | 0.02  | CHGB        | 0     | CHEK1       | 0.03  | MAP2K4      | 0     |
| CAV2        | 0     | NFE2        | 0.02  | FASN        | 0     | ZFYVE16     | 0     |
| IL13        | 0.05  | SCNN1G      | 0.05  | RPL31       | 0.05  | SAT         | 0.03  |
| IRS1        | 0.04  | HSPA4       | 0     | SLC1A1      | 0.04  | EIF2S2      | 0.02  |
| NTRK1       | 0     | SH3GL2      | 0.01  | ZNF165      | 0.05  | CAPZB       | 0.04  |
| PIK3R1      | 0.04  | CTDP1       | 0.02  | MTMR9       | 0     | RPA2        | 0.02  |
| MAPK8       | 0.05  | CUTL2       | 0     | ZAP70       | 0.03  | TK1         | 0.02  |
| COL5A2      | 0     | KIF5A       | 0.05  | SMAD9       | 0.04  | YLPM1       | 0     |
| ATXN1       | 0     | TP53BP2     | 0.01  | TNNT1       | 0.05  | CYCS        | 0.04  |
| RAPGEF4     | 0.01  | NCOA2       | 0     | GRIA1       | 0     | ITGA4       | 0.04  |
| SPEN        | 0     | GRM3        | 0.01  | NUMA1       | 0     | CKS2        | 0.03  |
| TMEM23      | 0.04  | FOSL2       | 0.05  | GJA7        | 0     | SPTAN1      | 0     |
| BCR         | 0.01  | CTCF        | 0.01  | TAF13       | 0.04  | GRIA2       | 0     |
| ALOX12      | 0     | FLNA        | 0.01  | BUB1        | 0.04  | PRKCB1      | 0.02  |
| YES1        | 0.03  | TRAF2       | 0.02  | CDC20       | 0.04  | FOXO1A      | 0     |
| NRP1        | 0.01  | FCER1G      | 0.01  | ACTC        | 0.01  | MYCBP2      | 0     |
| NGFR        | 0.05  | TIAM1       | 0.02  | ZNF42       | 0     | NEFL        | 0.05  |
| JAK2        | 0.01  | CHP         | 0.03  | RHOQ        | 0.02  | DAG1        | 0.04  |
| ARHGDI1     | 0.03  | MAPK8IP2    | 0.01  | CALD1       | 0.02  |             |       |
