# Supplementary material for: A Systems Biology-Based Gene Expression Classifier of Glioblastoma Predicts Survival with Solid Tumors
Source: PubMed Central journal article supplement (PMC2707631; doi:10.1371/journal.pone.0006274), 2009-07-17
Supplement: pone.0006274.s015.pdf [file pone.0006274.s015.pdf]

**Table S9.** List of candidate survival-associated genes developed by method B from primary GBM data in MDA.

| Gene Symbol | Score | Gene Symbol | Score | Gene Symbol | Score | Gene Symbol | Score |
|-------------|-------|-------------|-------|-------------|-------|-------------|-------|
| EPN1        | 0     | NFKBIA      | 0     | ITGB2       | 0     | TAF9L       | 0.05  |
| DTX2        | 0.05  | RB1         | 0.01  | SUV39H1     | 0.03  | GRB7        | 0.01  |
| MTF2        | 0.05  | XPO1        | 0.02  | LRP2        | 0.01  | CAV3        | 0     |
| ASCC2       | 0.02  | FLT3        | 0.01  | SFRS2       | 0.11  | ARRB1       | 0.02  |
| EMD         | 0.01  | SCNN1A      | 0.02  | SFRS6       | 0     | PPFIBP2     | 0     |
| PCNA        | 0.01  | RFC5        | 0     | SMARCA3     | 0.03  | FYB         | 0.02  |
| TMPO        | 0.03  | RPA2        | 0     | MDC1        | 0.02  | SFN         | 0.12  |
| LYN         | 0     | DYRK1A      | 0.01  | CLTC        | 0     | CSPG2       | 0.01  |
| CBX8        | 0     | PTN         | 0.01  | POU3F4      | 0.04  | HLA-DPA1    | 0.05  |
| CDK2        | 0     | RAD51C      | 0     | DHX9        | 0.03  | POLA        | 0     |
| PTHLH       | 0     | CD33        | 0.01  | NR3C1       | 0.03  | BID         | 0.05  |
| COIL        | 0.02  | HLA-A       | 0.04  | NFKB1       | 0.02  | IL1B        | 0.01  |
| KIAA0980    | 0     | RARB        | 0.01  | SI          | 0.07  | CLU         | 0.02  |
| RSRC1       | 0.05  | POLR2D      | 0.01  | RUNX2       | 0.05  | SCN5A       | 0.01  |
| CAV1        | 0.04  | DPPA4       | 0.01  | ACTB        | 0.1   | TIMELESS    | 0.02  |
| PLCG2       | 0.02  | GMFB        | 0.05  | LAPTM5      | 0.02  | POMT2       | 0     |
| MYB         | 0.05  | MYC         | 0.01  | INCENP      | 0.03  | IL8RB       | 0.03  |
| E2F1        | 0     | SREBF1      | 0.03  | CBX5        | 0     | PEG3        | 0.01  |
| DNAA3       | 0.02  | KIF15       | 0.03  | KIAA0179    | 0.01  | PRKX        | 0.02  |
| C20orf12    | 0.01  | TLR2        | 0.01  | MEIS1       | 0.07  | APOE        | 0.03  |
| CTNNA1      | 0     | IRF4        | 0.02  | PBX3        | 0.01  | RHOH        | 0.03  |
| MSH6        | 0     | ZNF451      | 0.04  | MSH2        | 0.01  | DOK5        | 0.01  |
| HSPD1       | 0.05  | C1orf149    | 0     | BTG3        | 0.03  | DNMT3A      | 0     |
| RAD51       | 0.02  | PAWR        | 0     | FLJ20364    | 0.01  | HCK         | 0.02  |
| CDC25A      | 0.05  | TAC3        | 0.02  | CTNND1      | 0.02  | PRKD1       | 0.04  |
| SMAD5       | 0.05  | NCOR2       | 0.02  | RAD1        | 0.07  | MAP3K14     | 0     |
| MCM2        | 0.03  | CSF1R       | 0.02  | SLD5        | 0     | HLA-B       | 0.03  |
| CCHCR1      | 0.02  | NFKBIB      | 0.03  | TRAF5       | 0.01  | CSF3R       | 0.01  |
| SKP2        | 0     | RNPS1       | 0     | STMN1       | 0.02  | LCP2        | 0     |
| NIF3L1      | 0.02  | KRT18       | 0.02  | SON         | 0.07  | ACVR2A      | 0.01  |
| FUSIP1      | 0.03  | CDC6        | 0.04  | INPP4A      | 0.05  | ATF4        | 0.01  |
| MYCBP       | 0.2   | TP73        | 0.03  | TNFRSF11A   | 0     | MCM3        | 0.01  |
| PIK3R3      | 0     | KRT15       | 0.01  | KRT6B       | 0.01  |             |       |
