# Supplementary material for: A Systems Biology-Based Gene Expression Classifier of Glioblastoma Predicts Survival with Solid Tumors
Source: PubMed Central journal article supplement (PMC2707631; doi:10.1371/journal.pone.0006274), 2009-07-17
Supplement: pone.0006274.s016.pdf [file pone.0006274.s016.pdf]

**Table S10.** List of prognostic genes developed by method B from primary GBM data in UCLA, UCSF-1, and MDA.

| <b>Description</b>                              | <b>Gene Symbol</b> | <b>Entrez ID</b> |
|-------------------------------------------------|--------------------|------------------|
| BH3 interacting domain death agonist            | BID                | 637              |
| cyclin-dependent kinase 2                       | CDK2               | 1017             |
| replication protein A2, 32kDa                   | RPA2               | 6118             |
| CTD phosphatase, subunit 1                      | CTDP1              | 9150             |
| phospholipase C, gamma 1 (formerly subtype 148) | PLCG1              | 5335             |
| v-jun sarcoma virus 17 oncogene homolog (avian) | JUN                | 3725             |
