# Supplementary material for: A Systems Biology-Based Gene Expression Classifier of Glioblastoma Predicts Survival with Solid Tumors
Source: PubMed Central journal article supplement (PMC2707631; doi:10.1371/journal.pone.0006274), 2009-07-17
Supplement: pone.0006274.s017.pdf [file pone.0006274.s017.pdf]

**Table S11.** List of candidate survival-associated genes developed by method C from primary GBM data in UCLA.

| Entrez ID | Gene Symbol | Entrez ID | Gene Symbol | Entrez ID | Gene Symbol | Entrez ID | Gene Symbol   |
|-----------|-------------|-----------|-------------|-----------|-------------|-----------|---------------|
| 4493      | MT1E        | 2184      | FAH         | 56255     | DJ971N18.2  | 3423      | IDS           |
| 4885      | NPTX2       | 10530     | RIG         | 23367     | LARP1       | 5577      | PRKAR2B       |
| 55268     | ECHDC2      | 27295     | PDLIM3      | 117178    | SSX2IP      | 8836      | GGH           |
| 2013      | EMP2        | 9071      | CLDN10      | 8871      | SYNJ2       | 25891     | DKFZP586H2123 |
| 6284      | S100A13     | 104       | ADARB1      | 6169      | RPL38       | 8496      | PPFIBP1       |
| 4499      | MT1K        | 5634      | PRPS2       | 28231     | SLCO4A1     | 25907     | RIS1          |
| 8991      | SELENBP1    | 4495      | MT1G        | 93664     | CADPS2      | 8507      | ENC1          |
| 1635      | DCTD        | 25876     | C20orf28    | 51477     | ISYNA1      | 10076     | PTPRU         |
| 29015     | SLC43A3     | 4599      | MX1         | 10581     | IFITM2      | 1432      | MAPK14        |
| 8572      | PDLIM4      | 2157      | F8          | 79022     | MGC5576     | 9488      | PIGB          |
| 64114     | PPI201      | 30008     | EFEMP2      | 55337     | FLJ11286    | 90627     | STARD13       |
| 3488      | IGFBP5      | 79871     | C1orf82     | 4192      | MDK         | 54588     | MXRA7         |
| 1534      | CYB561      | 307       | ANXA4       | 2192      | FBLN1       | 25830     | SULT4A1       |
| 51226     | COPZ2       | 23633     | KPNA6       | 25972     | UNC50       | 64782     | ISG20L1       |
| 2766      | GMPR        | 10404     | PGCP        | 6508      | SLC4A3      | 655       | BMP7          |
| 57212     | KIAA0495    | 7360      | UGP2        | 23215     | BAT2D1      | 7130      | TNFAIP6       |
| 51673     | CGI-38      | 57030     | SLC17A7     | 114884    | OSBPL10     | 1039      | CDR2          |
| 1307      | COL16A1     | 51299     | NRN1        | 11277     | TREX1       | 81031     | SLC2A10       |
| 3223      | HOXC6       | 10410     | IFITM3      | 760       | CA2         | 23245     | ASTN2         |
| 4494      | MT1F        | 3708      | ITPR1       | 79778     | MICAL-L2    | 56339     | METTL3        |
| 8996      | NOL3        | 3939      | LDHA        | 7037      | TFRC        | 657       | BMPR1A        |
| 6817      | SULT1A1     | 7039      | TGFA        | 8553      | BHLHB2      | 7832      | BTG2          |
| 3418      | IDH2        | 622       | BDH         | 873       | CBR1        | 5587      | PRKD1         |
| 10398     | MYL9        | 4900      | NRGN        | 32        | ACACB       | 57820     | CCNB1IP1      |
| 9609      | RAB36       | 4502      | MT2A        | 1346      | COX7A1      | 637       | BID           |
| 5919      | RARRES2     | 56683     | C21orf59    | 284119    | PTRF        | 57117     | PHF22         |
| 55742     | PARVA       | 23075     | SWAP70      | 6616      | SNAP25      | 94134     | ARHGAP12      |
| 4061      | LY6E        | 54882     | ANKHD1      | 6620      | SNCB        | 114088    | TRIM9         |
| 9645      | MICAL2      | 10190     | TXNDC9      | 9208      | LRRFIP1     | 23127     | GLT25D2       |
| 1499      | CTNNB1      | 54969     | FLJ20534    | 5327      | PLAT        | 7570      | ZNF22         |
| 9104      | RGN         | 5999      | RGS4        | 8819      | SAP30       | 4862      | NPAS2         |
| 4826      | NNAT        | 55008     | HERC6       | 3598      | IL13RA2     | 5372      | PMM1          |
| 55295     | FLJ11078    | 6385      | SDC4        | 23531     | MMD         | 8566      | PDXK          |
| 9956      | HS3ST2      | 2249      | FGF4        | 54897     | CASZ1       | 283638    | KIAA0284      |
| 5322      | PLA2G5      | 24139     | EML2        | 11000     | SLC27A3     | 6622      | SNCA          |
| 7164      | TPD52L1     | 10602     | CDC42EP3    | 22977     | AKR7A3      | 3094      | HINT1         |
| 10397     | NDRG1       | 5471      | PPAT        | 10505     | SEMA4F      | 10391     | CORO2B        |
| 7026      | NR2F2       | 1525      | CXADR       | 112950    | MED8        | 1728      | NQO1          |
| 6990      | TCTE1L      | 51176     | LEF1        | 7286      | TUFT1       | 7277      | TUBA1         |
| 56675     | NRIP3       | 445       | ASS         | 4496      | MT1H        | 23181     | C21orf106     |
| 80036     | TRPM3       | 5805      | PTS         | 10993     | SDS         | 1174      | AP1S1         |
| 6799      | SULT1A2     | 64285     | RHBDF1      | 55884     | WSB2        | 10745     | PHTF1         |
| 3964      | LGALS8      | 1548      | CYP2A6      | 91289     | BC002942    | 79717     | PPCS          |
| 6285      | S100B       |           |             |           |             |           |               |
