# Supplementary material for: A Systems Biology-Based Gene Expression Classifier of Glioblastoma Predicts Survival with Solid Tumors
Source: PubMed Central journal article supplement (PMC2707631; doi:10.1371/journal.pone.0006274), 2009-07-17
Supplement: pone.0006274.s018.pdf [file pone.0006274.s018.pdf]

**Table S12.** List of candidate survival-associated genes developed by method C from primary GBM data in UCSF-1.

| Entrez ID | Gene Symbol | Entrez ID | Gene Symbol | Entrez ID | Gene Symbol | Entrez ID | Gene Symbol   |
|-----------|-------------|-----------|-------------|-----------|-------------|-----------|---------------|
| 23480     | SEC61G      | 5631      | PRPS1       | 23466     | CBX6        | 119       | ADD2          |
| 4057      | LTF         | 871       | SERPINH1    | 5297      | PIK4CA      | 10529     | NEBL          |
| 4060      | LUM         | 3725      | JUN         | 10396     | ATP8A1      | 6363      | CCL19         |
| 1278      | COL1A2      | 3028      | HADH2       | 58473     | PLEKHB1     | 54453     | RIN2          |
| 1281      | COL3A1      | 3842      | TNPO1       | 6844      | VAMP2       | 2746      | GLUD1         |
| 4837      | NNMT        | 991       | CDC20       | 147179    | WIRE        | 9806      | SPOCK2        |
| 10135     | PBEF1       | 9689      | BZW1        | 11215     | AKAP11      | 29        | ABR           |
| 4223      | MEOX2       | 55816     | DOK5        | 283638    | KIAA0284    | 8514      | KCNAB2        |
| 1116      | CHI3L1      | 7431      | VIM         | 1584      | CYP11B1     | 26106     | DKFZP586K1520 |
| 3485      | IGFBP2      | 3308      | HSPA4       | 80303     | EFHD1       | 2220      | FCN2          |
| 1268      | CNR1        | 2787      | GNG5        | 5730      | PTGDS       | 7102      | TSPAN7        |
| 2152      | F3          | 389       | RHOC        | 8525      | DGKZ        | 801       | CALM1         |
| 6648      | SOD2        | 5686      | PSMA5       | 23710     | GABARAPL1   | 9173      | IL1RL1        |
| 2014      | EMP3        | 8754      | ADAM9       | 140609    | NEK7        | 8888      | MCM3AP        |
| 5947      | RBP1        | 8813      | DPM1        | 770       | CA11        | 23112     | TNRC6B        |
| 7422      | VEGF        | 25932     | CLIC4       | 4601      | MXI1        | 6720      | SREBF1        |
| 2171      | FABP5       | 6929      | TCF3        | 599       | BCL2L2      | 2492      | FSHR          |
| 358       | AQP1        | 10434     | LYPLA1      | 9150      | CTDP1       | 6122      | RPL3          |
| 7045      | TGFBI       | 22856     | CHSY1       | 23158     | KIAA0882    | 9284      | NPIP          |
| 1282      | COL4A1      | 8407      | TAGLN2      | 5860      | QDPR        | 3047      | HBG1          |
| 10630     | PDPN        | 7153      | TOP2A       | 84162     | KIAA1109    | 9804      | TOMM20        |
| 3371      | TNC         | 420676    | C7orf24     | 3705      | ITPK1       | 10314     | LANCL1        |
| 1290      | COL5A2      | 10949     | HNRPA0      | 815       | CAMK2A      | 3207      | HOXA11        |
| 2173      | FABP7       | 1017      | CDK2        | 23164     | M-RIP       | 10409     | BASP1         |
| 2335      | FN1         | 80317     | ZNF306      | 333       | APLP1       | 782       | CACNB1        |
| 5806      | PTX3        | 7298      | TYMS        | 11202     | KLK8        | 22924     | MAPRE3        |
| 2633      | GBP1        | 1647      | GADD45A     | 23048     | FNBP1       | 56311     | ANKRD7        |
| 5359      | PLSCR1      | 1019      | CDK4        | 339287    | LOC339287   | 6385      | SDC4          |
| 5054      | SERPINE1    | 5236      | PGM1        | 8427      | ZNF282      | 6900      | CNTN2         |
| 3486      | IGFBP3      | 10956     | OS9         | 23387     | KIAA0999    | 5870      | RAB6A         |
| 3956      | LGALS1      | 8970      | HIST1H2BJ   | 26999     | CYFIP2      | 5299      | SERPINA2      |
| 3491      | CYR61       | 3336      | HSPE1       | 219654    | C10orf56    | 8927      | BSN           |
| 3821      | KLRC1       | 10920     | COPS8       | 527       | ATP6V0C     | 23241     | PACS2         |
| 3823      | KLRC3       | 10130     | PDIA6       | 4714      | NDUFB8      | 1408      | CRY2          |
| 6616      | SNAP25      | 182       | JAG1        | 9728      | KIAA0256    | 7741      | ZNF187        |
| 4900      | NRGN        | 1031      | CDKN2C      | 6340      | SCNN1G      | 29907     | SNX15         |
| 8537      | BCAS1       | 86        | ACTL6A      | 23558     | WBP2        | 6407      | SEMG2         |
| 7368      | UGT8        | 1000      | CDH2        | 246308    | KLHL9       | 2113      | ETS1          |
| 288       | ANK3        | 7965      | JTV1        | 2550      | GABBR1      | 5578      | PRKCA         |
| 4747      | NEFL        | 5928      | RBBP4       | 8036      | SHOC2       | 9693      | RAPGEF2       |
| 6812      | STXBP1      | 4811      | NID1        | 2194      | FASN        | 23405     | DICER1        |
| 5178      | PEG3        | 2902      | GRIN1       | 6709      | SPTAN1      | 217       | ALDH2         |
| 2891      | GRIA2       | 23077     | MYCBP2      | 9497      | SLC4A7      | 5510      | PPP1R7        |
| 11069     | RAPGEF4     | 120       | ADD3        | 9959      | USP12       | 9612      | NCOR2         |
| 9568      | GPR51       | 84193     | C14orf154   | 23177     | KIAA0582    | 9478      | CABP1         |
| 5354      | PLP1        | 347       | APOD        | 3812      | KIR3DL2     | 5064      | PALM          |
| 6252      | RTN1        | 23345     | SYNE1       | 1395      | CRHR2       | 818       | CAMK2G        |
| 7037      | TFRC        | 7381      | UQCRB       | 6638      | SNRPN       | 3223      | HOXC6         |
| 8905      | AP1S2       | 4130      | MAP1A       | 10360     | NPM3        | 5663      | PSEN1         |
| 7018      | TF          | 23136     | EPB41L3     | 5261      | PHKG2       | 56650     | C3orf4        |
| 8848      | TSC22D1     |           |             |           |             |           |               |
