# Supplementary material for: A Systems Biology-Based Gene Expression Classifier of Glioblastoma Predicts Survival with Solid Tumors
Source: PubMed Central journal article supplement (PMC2707631; doi:10.1371/journal.pone.0006274), 2009-07-17
Supplement: pone.0006274.s019.pdf [file pone.0006274.s019.pdf]

**Table S13.** List of candidate survival-associated genes developed by method C from primary GBM data in MDA.

| EntrezID | GeneSymbol    | EntrezID | GeneSymbol | EntrezID | GeneSymbol   | EntrezID | GeneSymbol |
|----------|---------------|----------|------------|----------|--------------|----------|------------|
| 1017     | CDK2          | 7112     | TMPO       | 51363    | GALNAC4S-6ST | 6603     | SMARCD2    |
| 2013     | EMP2          | 6839     | SUV39H1    | 718      | C3           | 83955    | FKSG17     |
| 4172     | MCM3          | 7153     | TOP2A      | 10858    | CYP46A1      | 8125     | ANP32A     |
| 5074     | PAWR          | 9833     | MELK       | 11118    | BTN3A2       | 30       | ACAA1      |
| 79000    | C1orf135      | 29092    | HSPC157    | 7879     | RAB7         | 6678     | SPARC      |
| 5947     | RBP1          | 9918     | CNAP1      | 51347    | TAOK3        | 84939    | MUM1       |
| 10127    | ZNF263        | 1968     | EIF2S3     | 26020    | LRP10        | 23780    | APOL2      |
| 8914     | TIMELESS      | 10682    | EBP        | 1153     | CIRBP        | 9957     | HS3ST1     |
| 23306    | KIAA0286      | 10615    | SPAG5      | 5141     | PDE4A        | 23466    | CBX6       |
| 10950    | BTG3          | 6118     | RPA2       | 195      | AHNAK        | 23180    | RAFTLIN    |
| 5422     | POLA          | 8480     | RAE1       | 2124     | EVI2B        | 3122     | HLA-DRA    |
| 5985     | RFC5          | 4678     | NASP       | 2209     | FCGR1A       | 1778     | DNCH1      |
| 9768     | KIAA0101      | 1524     | CX3CR1     | 402055   | LOC402055    | 2357     | FPR1       |
| 2618     | GART          | 773      | CACNA1A    | 10150    | MBNL2        | 55901    | THSD1      |
| 4171     | MCM2          | 8623     | ASMTL      | 5788     | PTPRC        | 770      | CA11       |
| 56938    | ARNTL2        | 2123     | EVI2A      | 10284    | SAP18        | 222070   | LOC222070  |
| 79135    | MGC4825       | 4067     | LYN        | 11031    | RAB31        | 9805     | SCRN1      |
| 51203    | NUSAP1        | 9993     | DGCR2      | 6319     | SCD          | 23621    | BACE1      |
| 79979    | CXorf34       | 1462     | CSPG2      | 5742     | PTGS1        | 83660    | TLN2       |
| 5810     | RAD1          | 3119     | HLA-DQB1   | 23091    | KIAA0853     | 2891     | GRIA2      |
| 22981    | KIAA0980      | 7043     | TGFB3      | 6404     | SELPLG       | 6196     | RPS6KA2    |
| 79022    | MGC5576       | 50610    | C22orf9    | 214      | ALCAM        | 64108    | IFRG28     |
| 29980    | DONSON        | 1727     | CYB5R3     | 7805     | LAPTM5       | 10384    | BTN3A3     |
| 94431    | LOC94431      | 23273    | KIAA0367   | 56034    | PDGFC        | 719      | C3AR1      |
| 10745    | PHTF1         | 10875    | FGL2       | 9882     | TBC1D4       | 6036     | RNASE2     |
| 2956     | MSH6          | 7078     | TIMP3      | 64231    | MS4A6A       | 240      | ALOX5      |
| 10204    | NUTF2         | 6767     | ST13       | 274      | BIN1         | 94134    | ARHGAP12   |
| 90861    | C16orf34      | 3916     | LAMP1      | 7305     | TYROBP       | 7101     | NR2E1      |
| 2528     | FUT6          | 23492    | CBX7       | 10964    | IFI44L       | 8376     | IFIT3      |
| 5433     | POLR2D        | 4792     | NFKBIA     | 2033     | EP300        | 9848     | MFAP3L     |
| 55355    | DKFZp762E1312 | 1436     | CSF1R      | 64798    | DEPDC6       | 6503     | SLA        |
| 55220    | FLJ10748      | 3113     | HLA-DPA1   | 5341     | PLEK         | 3394     | IRF8       |
| 7752     | ZNF200        | 972      | CD74       | 4973     | OLR1         | 963      | CD53       |
| 55268    | ECHDC2        | 8881     | CDC16      | 8082     | SSPN         | 26011    | ODZ4       |
| 29893    | TBPIP         | 8611     | PPAP2A     | 7070     | THY1         | 57406    | ABHD6      |
| 54908    | FLJ20364      | 3115     | HLA-DPB1   | 10979    | PLEKHC1      | 8031     | NCOA4      |
| 83461    | CDCA3         | 4134     | MAP4       | 65983    | NS3TP2       | 28996    | HIPK2      |
| 4090     | SMAD5         | 8635     | RNASET2    | 55273    | FLJ10970     | 29082    | CHMP4A     |
| 94104    | C21orf66      | 6480     | ST6GAL1    | 8717     | TRADD        | 9770     | RASSF2     |
| 1869     | E2F1          | 351      | APP        | 713      | C1QB         | 6642     | SNX1       |
| 10681    | GNB5          | 4332     | MNDA       | 2209     | FCGR1A       | 10766    | TOB2       |
| 983      | CDC2          | 115207   | KCTD12     | 11240    | PADI2        | 824      | CAPN2      |
| 5928     | RBBP4         | 9414     | TJP2       | 23258    | RAB6IP1      | 23235    | SNF1LK2    |
| 10051    | SMC4L1        | 6348     | CCL3       | 9935     | MAFB         | 9445     | ITM2B      |
| 5557     | PRIM1         | 1410     | CRYAB      | 6518     | SLC2A5       | 23114    | NFASC      |
| 80222    | TARSL1        | 57817    | HAMP       | 11078    | HRIHFB2122   | 3108     | HLA-DMA    |
| 52       | ACPI          | 23136    | EPB41L3    | 24144    | TFIP11       | 55701    | FLJ10357   |
| 92       | ACVR2A        | 23317    | DNAJC13    | 1496     | CTNNA2       | 6604     | SMARCD3    |
| 115353   | LRRRC42       | 199      | AIF1       | 6001     | RGS10        | 4329     | ALDH6A1    |
| 5427     | POLE2         | 83937    | RASSF4     | 23034    | SAMD4        | 1734     | DIO2       |
| 11120    | BTN2A1        | 50863    | HNT        | 55303    | GIMAP4       | 3118     | HLA-DQA2   |
| 8473     | OGT           | 1230     | CCR1       | 3433     | IFIT2        | 10656    | KHDRBS3    |
| 6790     | STK6          | 3689     | ITGB2      | 23643    | LY96         | 397      | ARHGDI3    |
| 5889     | RAD51C        | 7462     | LAT2       | 221981   | LOC221981    | 1837     | DTNA       |
| 10921    | RNPS1         | 9945     | GFPT2      | 7070     | THY1         | 6347     | CCL2       |
| 24137    | KIF4A         | 558      | AXL        | 85477    | SCIN         | 1191     | CLU        |
| 81893    | LAT1-3TM      | 3123     | HLA-DRB1   | 8439     | NSMAF        | 51816    | CECR1      |
| 4173     | MCM4          | 29760    | BLNK       | 6376     | CX3CL1       | 114088   | TRIM9      |
| 1058     | CENPA         | 6351     | CCL4       | 9388     | LIPG         | 66008    | ALS2CR3    |
| 6418     | SET           | 64581    | CLEC7A     | 8404     | SPARCL1      | 1312     | COMT       |
| 6491     | SIL           | 3109     | HLA-DMB    | 2037     | EPB41L2      | 3117     | HLA-DQA1   |
| 79183    | C20orf121     | 10384    | BTN3A3     | 5654     | PRSS11       | 53346    | TM6SF1     |
| 1503     | CTPS          | 26018    | LRIG1      | 3782     | KCNN3        | 11151    | CORO1A     |
| 10229    | COQ7          | 942      | CD86       | 9450     | LY86         | 2207     | FCER1G     |
| 9735     | KNTC1         | 1500     | CTNND1     | 79682    | MLF1IP       | 124152   | MGC35048   |
| 4666     | NACA          | 113      | ADCY7      | 25941    | C18orf10     |          |            |
