# Supplementary material for: A Systems Biology-Based Gene Expression Classifier of Glioblastoma Predicts Survival with Solid Tumors
Source: PubMed Central journal article supplement (PMC2707631; doi:10.1371/journal.pone.0006274), 2009-07-17
Supplement: pone.0006274.s020.pdf [file pone.0006274.s020.pdf]

**Table S14.** List of prognostic genes developed by method C from primary GBM data in UCLA, UCSF-1, and MDA.

| <b>Description</b>                           | <b>Gene Symbol</b> | <b>Entrez ID</b> |
|----------------------------------------------|--------------------|------------------|
| epithelial membrane protein 2                | EMP2               | 2013             |
| putative homeodomain transcription factor 1  | PHTF1              | 10745            |
| hypothetical protein MGC5576                 | MGC5576            | 79022            |
| Rho GTPase activating protein 12             | ARHGAP12           | 94134            |
| transferrin receptor (p90, CD71)             | TFRC               | 7037             |
| retinol binding protein 1, cellular          | RBP1               | 5947             |
| glutamate receptor, ionotropic, AMPA 2       | GRIA2              | 2891             |
| topoisomerase (DNA) II alpha 170kDa          | TOP2A              | 7153             |
| cyclin-dependent kinase 2                    | CDK2               | 1017             |
| retinoblastoma binding protein 4             | RBBP4              | 5928             |
| erythrocyte membrane protein band 4.1-like 3 | EPB41L3            | 23136            |
