# Supplementary material for: A Systems Biology-Based Gene Expression Classifier of Glioblastoma Predicts Survival with Solid Tumors
Source: PubMed Central journal article supplement (PMC2707631; doi:10.1371/journal.pone.0006274), 2009-07-17
Supplement: pone.0006274.s021.pdf [file pone.0006274.s021.pdf]

**Table S15.** Multivariate cox regression analysis of previously reported prognostic genes for glioma in training and validation cohorts of glioma.

| Glioma | Cohort             | Covariate | 35 genes |                  | 44 genes         |                  | 47 genes         |                   |                  |
|--------|--------------------|-----------|----------|------------------|------------------|------------------|------------------|-------------------|------------------|
|        |                    |           | P value  | HR(CI95%)        | P value          | HR(CI95%)        | P value          | HR(CI95%)         |                  |
| GBM    | UCLA               | cluster   | 0.775    | 1.09 (0.59-2.01) | 0.236            | 1.32 (0.83-2.11) | 0.275            | 1.62 (0.68-3.85)  |                  |
|        |                    | age       | <0.0001  | 1.06 (1.03-1.10) | 0.01             | 1.05 (1.01-1.09) | <0.0001          | 1.06 (1.03-1.10)  |                  |
|        | UCSF-1             | cluster   | 0.006    | 1.77 (1.18-2.65) | 0.011            | 1.47 (1.09-1.98) | 0.001            | 4.34 (1.80-10.46) |                  |
|        | MDA                | cluster   | 0.825    | 1.04 (0.71-1.54) | 0.115            | 1.23 (0.95-1.95) | 0.122            | 1.64 (0.89-3.08)  |                  |
|        |                    | age       | 0.769    | 1.01 (0.98-1.03) | 0.768            | 1.01 (0.97-1.03) | 0.46             | 1.01 (0.98-1.04)  |                  |
|        | CMBC               | cluster   | 0.005    | 2.17 (1.27-3.70) | 0.013            | 1.61 (1.11-2.34) | 0.046            | 2.50 (1.01-6.17)  |                  |
|        | UCSF-2             | cluster   | 0.035    | 2.18 (1.06-4.51) | 0.004            | 3.13 (1.44-6.80) | 0.021            | 4.46(1.26-15.82)  |                  |
|        |                    | age       | 0.092    | 1.04 (0.99-1.09) | 0.021            | 1.07 (1.01-1.13) | 0.048            | 1.06 (1.00-1.11)  |                  |
|        | HGG(Grade III&GBM) | UCLA      | cluster  | 0.142            | 1.34 (0.91-1.98) | 0.035            | 1.41 (1.02-1.93) | 0.564             | 1.22 (0.62-2.42) |
|        |                    |           | grade    | 0.017            | 2.78 (1.20-6.43) | 0.022            | 2.62 (1.15-5.99) | 0.01              | 3.06 (1.30-7.22) |
| age    |                    |           | 0.227    | 1.01 (0.99-1.04) | 0.245            | 1.01 (0.99-1.04) | 0.169            | 1.02 (0.99-1.04)  |                  |
| MDA    |                    | cluster   | 0.274    | 1.24(0.84-1.82)  | 0.009            | 1.48 (1.11-1.99) | 0.603            | 1.21 (0.60-2.44)  |                  |
|        |                    | grade     | 0.051    | 2.23 (1.00-5.01) | 0.056            | 2.11 (0.98-4.52) | 0.021            | 2.49 (1.15-5.39)  |                  |
|        |                    | age       | 0.227    | 1.02(0.99-1.04)  | 0.39             | 1.01 (0.99-1.04) | 0.234            | 1.02 (0.99-1.04)  |                  |
| CMBC   |                    | cluster   | 0.045    | 1.69 (1.01-2.81) | 0.002            | 1.93 (1.28-2.91) | 0.017            | 2.57 (1.17-5.62)  |                  |
|        |                    | grade     | 0.177    | 1.80 (0.77-4.23) | 0.234            | 1.64 (0.73-3.67) | 0.156            | 1.82 (0.80-4.17)  |                  |

The direction of the hazard ratio are as follows: cluster, the shorter versus longer survival group; grade, GBM versus Grade III; age, older versus younger.
