# Supplementary material for: A Systems Biology-Based Gene Expression Classifier of Glioblastoma Predicts Survival with Solid Tumors
Source: PubMed Central journal article supplement (PMC2707631; doi:10.1371/journal.pone.0006274), 2009-07-17
Supplement: pone.0006274.s022.pdf [file pone.0006274.s022.pdf]

**Table S16.** Multivariate cox regression analysis of previously reported prognostic genes for glioma in training and validation cohorts of other tumors.

| Tumor type | Cohort  | Covariate | 35 genes         |                  | 44 genes         |                  | 47 genes         |                   |                  |
|------------|---------|-----------|------------------|------------------|------------------|------------------|------------------|-------------------|------------------|
|            |         |           | P value          | HR (CI95%)       | P value          | HR (CI95%)       | P value          | HR (CI95%)        |                  |
| Breast     | GIS     | cluster   | 0.141            | 1.35 (0.91-2.01) | 0.16             | 1.17 (0.94-1.45) | 0.666            | 1.16 (0.60-2.25)  |                  |
|            |         | grade     | 0.002            | 1.93 (1.28-2.91) | 0.02             | 1.72 (1.09-2.73) | 0.001            | 2.09 (1.37-3.19)  |                  |
|            |         | age       | 0.965            | 1.00 (0.98-1.02) | 0.925            | 1.01 (0.98-1.02) | 0.997            | 1.00 (0.98-1.02)  |                  |
|            | CRCM    | cluster   | <0.0001          | 2.34 (1.59-3.44) | 0.003            | 1.63 (1.18-2.25) | <0.0001          | 5.36 (2.60-11.09) |                  |
|            |         | grade     | <0.0001          | 3.75 (2.09-6.73) | <0.0001          | 2.93 (1.69-5.07) | <0.0001          | 4.18 (2.28-7.66)  |                  |
|            |         | age       | 0.916            | 1.01 (0.97-1.04) | 0.974            | 1.00 (0.97-1.03) | 0.731            | 1.00 (0.96-1.03)  |                  |
|            | SUSM    | cluster   | 0.077            | 1.37 (0.99-1.90) | 0.089            | 1.25 (0.97-1.62) | 0.293            | 1.29 (0.81-2.05)  |                  |
|            |         | grade     | <0.0001          | 2.42 (1.70-3.46) | <0.0001          | 2.28 (1.57-3.32) | <0.0001          | 2.48 (1.72-3.56)  |                  |
|            |         | age       | 0.022            | 0.96 (0.92-0.99) | 0.019            | 0.96 (0.91-0.99) | 0.022            | 0.96 (0.92-0.99)  |                  |
|            | Lung    | NCI       | cluster          | 0.656            | 1.09 (0.74-1.62) | 0.001            | 1.59 (1.20-2.11) | 0.099             | 1.87(0.89-3.91)  |
|            |         | EMC       | cluster          | 0.036            | 1.34 (1.02-1.75) | 0.062            | 1.16 (0.99-1.36) | 0.339             | 1.24 (0.80-1.91) |
|            |         | DFCI      | cluster          | 0.276            | 1.24 (0.84-1.83) | 0.14             | 1.28 (0.92-1.79) | 0.86              | 1.07 (0.52-2.20) |
| stage      |         |           | 0.099            | 1.96 (0.88-4.37) | 0.072            | 2.14 (0.93-4.88) | 0.133            | 1.85(0.83-4.12)   |                  |
| age        |         |           | 0.104            | 1.03 (0.99-1.07) | 0.203            | 1.03 (0.99-1.07) | 0.091            | 1.03 (1.00-1.08)  |                  |
| PCH        |         | cluster   | 0.092            | 1.59 (0.93-2.72) | 0.126            | 1.35 (0.92-1.99) | 0.564            | 1.28 (0.56-2.92)  |                  |
|            |         | age       | 0.262            | 1.02 (0.98-1.06) | 0.216            | 1.03 (0.98-1.07) | 0.346            | 1.02 (0.98-1.06)  |                  |
| CAN/DF     |         | cluster   | 0.854            | 1.06 (0.59-1.88) | 0.349            | 1.15 (0.86-1.52) | 0.942            | 1.03 (0.50-2.12)  |                  |
|            |         | stage     | 0.003            | 2.82 (1.43-5.54) | 0.004            | 2.71 (1.37-5.53) | 0.003            | 2.82 (1.44-5.55)  |                  |
|            |         | age       | 0.002            | 1.07 (1.03-1.12) | 0.001            | 1.07 (1.03-1.12) | 0.002            | 1.07 (1.03-1.12)  |                  |
| MSK        |         | cluster   | 0.019            | 2.06 (1.13-3.77) | 0.301            | 1.23 (0.83-1.84) | 0.325            | 1.55 (0.65-3.70)  |                  |
|            |         | stage     | 0.342            | 1.56 (0.62-3.92) | 0.187            | 1.84 (0.74-4.54) | 0.253            | 1.71 (0.68-4.30)  |                  |
|            | age     | 0.759     | 1.01 (0.96-1.06) | 0.388            | 1.02 (0.97-1.07) | 0.454            | 1.02 (0.97-1.07) |                   |                  |
| UM-HLM     | cluster | 0.773     | 1.04 (0.82-1.13) | 0.713            | 1.04 (0.83-1.31) | 0.231            | 1.26 (0.86-1.85) |                   |                  |
|            | stage   | <0.0001   | 2.31 (1.56-3.42) | <0.0001          | 2.31 (1.56-3.42) | <0.0001          | 2.31 (1.57-3.42) |                   |                  |
|            | age     | 0.002     | 1.03 (1.01-1.05) | 0.002            | 1.02 (1.01-1.05) | 0.003            | 1.03 (1.01-1.05) |                   |                  |
| Bladder    | AUH     | cluster   | 0.587            | 1.13 (0.73-1.76) | 0.27             | 1.25 (0.84-1.84) | 0.882            | 1.07 (0.46-2.46)  |                  |
| Ovarium    | MNI     | cluster   | 0.015            | 2.24 (1.17-4.29) | 0.01             | 1.99 (1.18-3.36) | 0.082            | 2.77 (0.88-8.70)  |                  |
|            |         | age       | 0.044            | 1.07 (1.01-1.14) | 0.059            | 1.06 (1.00-1.13) | 0.066            | 1.06 (1.00-1.13)  |                  |

The direction of the hazard ratio are as follows: cluster, the short-term versus long-term survival group; grade, lower versus higher; age, older versus younger.
