# Supplementary material for: A Systems Biology-Based Gene Expression Classifier of Glioblastoma Predicts Survival with Solid Tumors
Source: PubMed Central journal article supplement (PMC2707631; doi:10.1371/journal.pone.0006274), 2009-07-17
Supplement: pone.0006274.s023.pdf [file pone.0006274.s023.pdf]

**Table S17.** 25 prognostic genes developed by method A (Cox regression) from primary GBM data in UCLA, UCSF-1, and MDA. 15 prognostic genes are overlapped genes between 25 prognostic genes and 23 prognostic genes (see Table 2 in the manuscript).

| <b>25 prognostic genes</b> |                    | <b>15 prognostic genes</b> |                    |
|----------------------------|--------------------|----------------------------|--------------------|
| <b>Entrez ID</b>           | <b>Gene Symbol</b> | <b>Entrez ID</b>           | <b>Gene Symbol</b> |
| 5880                       | RAC2               | 7283                       | TUBG1              |
| 3459                       | IFNGR1             | 7298                       | TYMS               |
| 5788                       | PTPRC              | 891                        | CCNB1              |
| 1432                       | MAPK14             | 9133                       | CCNB2              |
| 7409                       | VAV1               | 8317                       | CDC7               |
| 7283                       | TUBG1              | 7374                       | UNG                |
| 5599                       | MAPK8              | 6119                       | RPA3               |
| 613                        | BCR                | 990                        | CDC6               |
| 2353                       | FOS                | 6118                       | RPA2               |
| 7298                       | TYMS               | 6240                       | RRM1               |
| 891                        | CCNB1              | 1786                       | DNMT1              |
| 9168                       | TMSB10             | 9232                       | PTTG1              |
| 3939                       | LDHA               | 8836                       | GGH                |
| 8836                       | GGH                | 5880                       | RAC2               |
| 7374                       | UNG                | 3459                       | IFNGR1             |
| 6119                       | RPA3               |                            |                    |
| 6240                       | RRM1               |                            |                    |
| 8317                       | CDC7               |                            |                    |
| 6118                       | RPA2               |                            |                    |
| 990                        | CDC6               |                            |                    |
| 9232                       | PTTG1              |                            |                    |
| 9133                       | CCNB2              |                            |                    |
| 5532                       | PPP3CB             |                            |                    |
| 1786                       | DNMT1              |                            |                    |
| 4067                       | LYN                |                            |                    |
