# Supplementary material for: A Systems Biology-Based Gene Expression Classifier of Glioblastoma Predicts Survival with Solid Tumors
Source: PubMed Central journal article supplement (PMC2707631; doi:10.1371/journal.pone.0006274), 2009-07-17
Supplement: pone.0006274.s024.pdf [file pone.0006274.s024.pdf]

**Table S18.** Multivariate cox regression analysis of 25 genes and 15 genes in training and validation cohorts of glioma.

| Glioma              | Cohort | Covariate | 25 genes |                   | 15 genes |                   |
|---------------------|--------|-----------|----------|-------------------|----------|-------------------|
|                     |        |           | P value  | HR (CI95%)        | P value  | HR (CI95%)        |
| GBM                 | UCLA   | cluster   | 0.223    | 1.76 (0.71-4.36)  | 0.221    | 1.70 (0.73-4.00)  |
|                     |        | age       | 0.001    | 1.06 (1.03-1.10)  | <0.0001  | 1.06 (1.03-1.10)  |
|                     | UCSF-1 | cluster   | 0.002    | 3.67 (1.60-8.42)  | 0.002    | 3.67 (1.60-8.42)  |
|                     | MDA    | cluster   | 0.005    | 2.59 (1.33-5.02)  | 0.003    | 2.64 (1.38-5.04)  |
|                     |        | age       | 0.921    | 1.00 (0.97-1.03)  | 0.913    | 1.00 (0.97-1.03)  |
|                     | CMBC   | cluster   | 0.011    | 5.87 (1.68-20.54) | 0.054    | 2.34 (0.99-5.55)  |
|                     | UCSF-2 | cluster   | 0.022    | 4.06 (1.22-13.46) | 0.037    | 4.24 (1.09-16.52) |
|                     |        | age       | 0.068    | 1.05 (1.00-1.10)  | 0.09     | 1.04 (0.99-1.09)  |
| HGG (Grade III&GBM) | UCLA   | cluster   | 0.524    | 1.25 (0.63-2.45)  | 0.284    | 1.38 (0.76-2.51)  |
|                     |        | grade     | 0.003    | 3.89 (1.58-9.57)  | 0.004    | 3.19 (1.44-7.05)  |
|                     |        | age       | 0.133    | 1.02 (1.00-1.04)  | 0.154    | 1.02 (0.99-1.04)  |
|                     | MDA    | cluster   | 0.001    | 2.47 (1.42-4.30)  | 0.007    | 2.08 (1.24-3.52)  |
|                     |        | grade     | 0.006    | 2.81 (1.34-5.88)  | 0.022    | 2.39 (1.13-5.05)  |
|                     |        | age       | 0.301    | 1.01 (0.99-1.04)  | 0.172    | 1.02 (0.99-1.04)  |
|                     | CMBC   | cluster   | 0.076    | 1.94 (0.93-4.04)  | 0.873    | 1.06 (0.51-2.19)  |
|                     |        | grade     | 0.036    | 2.28 (1.06-4.93)  | 0.017    | 2.61 (1.19-5.76)  |

The direction of the hazard ratio are as follows: cluster, the short-term versus long-term survival group; grade, GBM versus Grade III; age, older versus younger.
