# Supplementary material for: A Systems Biology-Based Gene Expression Classifier of Glioblastoma Predicts Survival with Solid Tumors
Source: PubMed Central journal article supplement (PMC2707631; doi:10.1371/journal.pone.0006274), 2009-07-17
Supplement: pone.0006274.s025.pdf [file pone.0006274.s025.pdf]

**Table S19.** Multivariate cox regression analysis of 25 genes and 15 genes in training and validation cohorts of other tumors.

| Tumor type | Cohort | Covariate | 25 genes         |                   | 15 genes         |                  |                  |
|------------|--------|-----------|------------------|-------------------|------------------|------------------|------------------|
|            |        |           | P value          | HR (CI95%)        | P value          | HR (CI95%)       |                  |
| Breast     | GIS    | cluster   | 0.086            | 1.66 (0.93-2.95)  | 0.223            | 1.45 (0.80-2.63) |                  |
|            |        | grade     | 0.007            | 1.80 (1.18-2.76)  | 0.001            | 2.03 (1.36-3.04) |                  |
|            |        | age       | 0.781            | 1.00 (0.98-1.02)  | 0.893            | 1.00 (0.98-1.02) |                  |
|            | CRCM   | cluster   | <0.0001          | 5.17 (2.63-10.17) | <0.0001          | 4.18 (2.20-7.97) |                  |
|            |        | grade     | <0.0001          | 3.86 (2.18-6.85)  | <0.0001          | 3.08 (1.76-5.40) |                  |
|            |        | age       | 0.87             | 1.00 (0.97-1.03)  | 0.642            | 0.99 (0.96-1.03) |                  |
|            | SUSM   | cluster   | 0.029            | 1.78 (1.06-2.99)  | 0.405            | 1.23 (0.76-1.98) |                  |
|            |        | grade     | 0.001            | 2.21 (1.51-3.22)  | <0.0001          | 2.51 (1.75-3.60) |                  |
|            |        | age       | 0.018            | 0.95 (0.92-0.99)  | 0.023            | 0.96 (0.92-0.99) |                  |
|            | Lung   | NCI       | cluster          | 0.04              | 2.22 (1.04-4.77) | 0.046            | 2.08 (1.01-4.26) |
|            |        | EMC       | cluster          | 0.001             | 1.86 (1.27-2.73) | 0.062            | 1.44 (0.98-2.12) |
|            |        | DFCI      | cluster          | 0.027             | 2.25 (1.10-4.61) | 0.019            | 2.37 (1.15-4.86) |
|            |        |           | stage            | 0.147             | 1.81 (0.81-4.04) | 0.187            | 1.72 (0.77-3.84) |
|            |        |           | age              | 0.12              | 1.03 (0.99-1.07) | 0.111            | 1.03 (0.99-1.07) |
|            |        | PCH       | cluster          | 0.448             | 1.39 (0.60-3.22) | 0.079            | 2.49 (0.90-6.88) |
| age        |        |           | 0.361            | 1.02 (0.98-1.06)  | 0.142            | 1.03 (0.99-1.08) |                  |
| CAN/DF     |        | cluster   | 0.125            | 1.96 (0.83-4.65)  | 0.416            | 1.34 (0.66-2.70) |                  |
|            |        | stage     | 0.038            | 2.19 (1.05-4.59)  | 0.002            | 2.99 (1.50-5.94) |                  |
|            |        | age       | 0.001            | 1.08 (1.03-1.13)  | 0.001            | 1.07 (1.03-1.12) |                  |
| MSK        |        | cluster   | 0.221            | 1.69 (0.73-3.94)  | 0.306            | 1.57 (0.66-3.70) |                  |
|            |        | stage     | 0.156            | 1.93 (0.78-4.78)  | 0.158            | 1.92 (0.78-4.76) |                  |
|            |        | age       | 0.394            | 1.02 (0.97-1.07)  | 0.303            | 1.03 (0.98-1.08) |                  |
| UM-HLM     |        | cluster   | 0.485            | 1.15 (0.78-1.70)  | 0.598            | 1.11 (0.76-1.63) |                  |
|            |        | stage     | <0.0001          | 2.21 (1.47-3.32)  | <0.0001          | 2.25 (1.51-3.36) |                  |
|            | age    | 0.001     | 1.03 (1.01-1.05) | 0.001             | 1.03 (1.01-1.05) |                  |                  |
| Bladder    | AUH    | cluster   | 0.049            | 2.22 (1.02-4.86)  | 0.072            | 2.05 (0.95-4.43) |                  |
| Ovarium    | MNI    | cluster   | 0.419            | 1.59 (0.52-4.94)  | 0.553            | 1.43 (0.44-4.72) |                  |
|            |        | age       | 0.078            | 1.06 (0.99-1.12)  | 0.114            | 1.05 (1.00-1.12) |                  |

The direction of the hazard ratio are as follows: cluster, the short-term versus long-term survival group; grade, lower versus higher; age, older versus younger.
