# Supplementary material for: A Systems Biology-Based Gene Expression Classifier of Glioblastoma Predicts Survival with Solid Tumors
Source: PubMed Central journal article supplement (PMC2707631; doi:10.1371/journal.pone.0006274), 2009-07-17
Supplement: pone.0006274.s027.pdf [file pone.0006274.s027.pdf]

**Table S21.** Multivariate cox regression analysis of prognostic gene sets in training and validation cohorts of glioma.

| <b>Glioma</b>        | <b>Cohort</b> | <b>Covariate</b> | <b>P value</b> | <b>HR (CI95%)</b> |
|----------------------|---------------|------------------|----------------|-------------------|
| GBM                  | UCLA          | cluster          | 0.269          | 1.68 (0.67-4.24)  |
|                      |               | age              | 0.001          | 1.06 (1.03-1.10)  |
|                      | UCSF-1        | cluster          | 0.198          | 1.58 (0.79-3.16)  |
|                      |               | MDA              | cluster        | 0.096             |
|                      | CMBC          | age              | 0.653          | 1.01 (0.98-1.04)  |
|                      |               | cluster          | 0.088          | 2.29 (0.88-5.91)  |
|                      | UCSF-2        | cluster          | 0.021          | 4.46 (1.26-15.82) |
|                      |               | age              | 0.048          | 1.06 (1.00-1.11)  |
| HGG (Glioma III&GBM) | UCLA          | cluster          | 0.413          | 1.30 (0.69-2.43)  |
|                      |               | grade            | 0.002          | 3.82 (1.65-8.85)  |
|                      |               | age              | 0.106          | 1.02 (1.00-1.04)  |
|                      | MDA           | cluster          | 0.006          | 2.38 (1.28-4.39)  |
|                      |               | grade            | 0.083          | 1.96 (0.92-4.21)  |
|                      |               | age              | 0.282          | 1.01 (0.99-1.04)  |
|                      | CMBC          | cluster          | 0.245          | 1.55 (0.74-3.22)  |
|                      |               | grade            | 0.009          | 2.71 (1.28-5.74)  |

The direction of the hazard ratio are as follows: cluster, the short-term versus long-term survival group; grade, GBM versus Grade III; age, older versus younger.
