# Supplementary material for: A Systems Biology-Based Gene Expression Classifier of Glioblastoma Predicts Survival with Solid Tumors
Source: PLoS One. 2009 Jul 17;4(7):e6274. doi: 10.1371/journal.pone.0006274 (PMC2707631; doi:10.1371/journal.pone.0006274)
Supplement: Table S20 — Prognostic gene sets (0.04 MB XLS) [file pone.0006274.s026.xls]

## Sheet: Sheet1
Table S20. Prognostic gene sets
Gene Set Name	Gene
FOLATE_BIOSYNTHESIS	SPR	ALPPL2	ALPP	DHFR
	FPGS	GGH	ALPL	ALPI
	GCH1	ALPP	ALPPL2
microtubule-based process	BRCA1	DNAH9	ESPL1	KPNA2
	MAP2	MUSK	PFDN4	RAN
	TTK	TUBA1	TUBA2	TUBA6
	TUBB4	TUBG1	TUBG2	WTAP
IDPATHWAY	ADD1	ATF3	CCNA2	CCNE1
	CDK2	ELK1	ELK3	ELK4
	HES1	ID1	ID2	ID3
	ID4	IFNGIP1	SMAD3	MYF5
	MYF6	MYOD1	MYOG	PAX2
	PAX5	PAX8	PSMD4	RB1
	TCF12	TCF3	MIDA1
CELL_CYCLE_KEGG	E2F2	CDAN1	MAD2L1	ESPL1
	HDAC4	CDC14B	ORC1L	CCNH
	CCNB2	HDAC2	MCM5	E2F3
	MPEG1	ASK	MCM6	CHEK1
	CDC6	MAD2L2	HDAC7A	PRKDC
	EP300	ABL1	GSK3B	BUB3
	ORC5L	CDC25A	CDK2	CDC25B
	SMC1L1	ORC6L	MCM4	TBC1D8
	E2F6	CCNE1	BUB1B	HDAC5
	MDM2	TP53	CDKN2A	CDC14A
	CHEK2	CCNE2	HDAC6	DTX4
	ORC4L	MCM2	TGFB1	PLK1
	ATM	ORC2L	CDC45L	MCM3
	TFDP1	PTTG2	PTTG3	E2F5
	CCND2	SMAD4	CDC25C	CCNA1
	E2F4	GADD45A	WEE1	HDAC1
	FLJ14001	SKP2	HDAC3	MPL
	MAD1L1	CDC20	MCM7	E2F1
	HDAC8	BUB1	CCNA2	PCNA
	CCNB3	CDC7	CDC2	CDH1
	RBL1	CDK4	CDC14B	RB1
	CCNB1	ORC3L	PTPRA	CCND3
	PTTG1	CDKN1A	CDC14C
METHIONINE_METABOLISM	DNMT2	MAT1A	CTH	MAT2B
	DNMT3B	CBS	DNMT3A	AHCY
	DNMT1	MTR	MARS	BHMT
	MARS2
P53PATHWAY	ATM	BCL2	E2F1	CDK2
	TIMP3	PCNA	CCNE1	MDM2
	GADD45A	TP53	CCND1	BAX
	CDK4	RB1	CDKN1A	APAF1
chromosome segregation	DDX11	ESPL1	MAD2L1	PSEN2
	PTTG1	RAD21
DNA replication initiation	CDC34	CDC45L	MCM2	MCM3
	MCM4
PYRIMIDINE_METABOLISM	POLR2E	POLE	NT5C	UCK2
	ECGF1	TK2	NME1	POLB
	UPB1	NP	POLR1B	POLD2
	TXNRD1	NUDT2	TYMS	CAD
	AK3L1	POLD1	UNG	CMPK
	DHODH	POLR2D	RRM1	AK3
	POLR2I	POLA	POLL	DCTD
	RRM2	NT5E	DCK	POLR2F
	POLR2K	CDA	DTYMK	POLR2G
	POLG	POLR2L	DUT	POLR2H
	POLS	UMPS	NME2	POLR2C
	CTPS	POLR2B	UPP1	POLR2J
	ITPA	POLR2A	AK3L1	AK3L2
	ENTPD1	POLRMT	POLQ	NT5M
	CTPS2	DPYD	TK1	DPYS
	UCK1	CANT1
TNFR1PATHWAY	LMNB2	MAP3K7	TNFRSF1A	ARHGDIB
	JUN	CRADD	CASP3	ADPRT
	PAK1	BAG4	RIPK1	CASP8
	LMNA	TNF	PRKDC	MAP2K4
	TRAF2	TRADD	MAP3K1	SPTAN1
	FADD	LMNB1	MADD	DFFB
	RB1	PAK2	CASP2	DFFA
	MAPK8
G1 phase of mitotic cell cycle	ANAPC2	CDC2	CDC25C	CDK2
	CDK6	TAF1
regulation of cell cycle	ABL1	ACPP	AIF1	AK1
	AKT1	AKT2	ANAPC2	APC
	ATF5	ATM	ATR	AXL
	BAX	BCAR3	BCCIP	BCL10
	BCL2	BIN1	BRCA1	BRCA2
	BTC	BTG3	BUB1B	BUB3
	CCNA1	CCNB1	CCNB2	CCND1
	CCND2	CCND3	CCNE1	CCNF
	CCNG1	CCNG2	CCNH	CCNI
	CCNK	CCT2	CDC16	CDC2
	CDC20	CDC25A	CDC25B	CDC25C
	CDC2L1	CDC2L5	CDC37	CDC45L
	CDK2	CDK3	CDK4	CDK5R1
	CDK6	CDK7	CDK8	CDK9
	CDKN1A	CDKN1B	CDKN2A	CDKN2B
	CDKN2C	CDKN2D	CDKN3	CHEK1
	CHEK2	CHES1	CKS1B	CRK
	CRKL	CSK	CTCF	CUL4A
	DDIT3	DDX11	DLG5	DUSP4
	DUSP6	E2F4	E2F6	ELK3
	ESPL1	ESR1	ETS1	ETS2
	F2R	FANCG	FGF1	FGF7
	FH	FHIT	FOS	FOSB
	FRAP1	FRK	FYN	GADD45A
	GAK	GAS7	HDAC3	HIC1
	HRAS	HUS1	IFITM1	IGF1R
	IGF2	IL1A	IL1B	IL8
	INHA	IRF1	JAK2	JUN
	JUNB	KLK10	KNTC1	LATS1
	LCK	LYN	MACF1	MAD1L1
	MAD2L1	MAFG	MAFK	MAP2K6
	MAP2K7	MAP3K8	MAPK12	MAPK3
	MAS1	MATK	MCC	MLH1
	MOS	MSH2	MYB	MYBL1
	MYBL2	MYC	NBL1	NF1
	NFYC	NME1	NME2	NR2F1
	NRAS	PCNA	PCTK2	PDGFB
	PGF	PIN1	PINX1	PMS1
	PMS2	PPM1D	PPP1R15A	PPP2R1B
	PRKCA	PRKG2	PSMD8	PTEN
	PTMA	PTMS	PTN	RAD17
	RAN	RAP1A	RB1	RBL2
	RPS6KB2	RRAS	S100A6	SKP2
	SMARCB1	SPHK1	SRC	STAT1
	TCF19	TERF1	TGFA	TGFB1
	TGFB3	THRA	TNFSF15	TOB2
	TP53	TP53BP2	TP73	TP73L
	TTK	UBE2C	UBE2V2	VAV1
	VAV2	VEGFB	VEGFC	VHL
	WEE1	WT1	YES1	ZAK
CDMACPATHWAY	RAF1	TNF	NFKBIA	PRKCB1
	HRAS	PRKCA	RELA	JUN
	MAPK3	PLCB1	NFKB1	MAPK1
	MAP2K1	FOS	MYC	CUZD1
SIG_BCR_SIGNALING_PATHWAY	CD19	PPP1R13B	VAV1	INPP5D
	SOS1	FLOT2	PPP3CC	MAPK3
	AKT1	CSK	PTPRC	MAP4K1
	SOS2	ITPR2	FLOT1	AKT3
	PIK3R1	GSK3A	PIK3CD	NR0B2
	NFATC2	SHC1	BLNK	CD81
	BCR	PPP3CA	RAF1	ITPR1
	PPP3CB	NFATC1	PDK1	GSK3B
	AKT2	BCL2	LYN	GRB2
	BTK	PIK3CA	PLCG2	BAD
	CD22	CR2	MAPK1	SYK
	DAG1	ITPR3
IFNAPATHWAY	STAT1	ISGF3G	IFNAR2	STAT2
	IFNB1	TYK2	IFNA1	IFNAR1
	JAK1
IFNGPATHWAY	STAT1	IFNG	JAK2	IFNGR2
	IFNGR1	JAK1
ST_B_CELL_ANTIGEN_RECEPTOR	CD19	PPP1R13B	VAV1	NFKBIA
	SOS1	PAG	AKT1	CSK
	SOS2	NFKBIB	NFAT5	PIK3R1
	AKT3	PIK3CD	MAP2K1	SHC1
	BLNK	NFKB2	ITPKB	BCR
	RAF1	EPHB2	AKT2	SERPINA4
	NFKBIL2	NFKBIE	LYN	GRB2
	BTK	PIK3CA	PLCG2	BAD
	PI3	MAP2K2	NFKB1	ITPKA
	MAPK1	NFKBIL1	SYK	DAG1
SIG_PIP3_SIGNALING_IN_B_LYMPHOCYTES	CD19	PPP1R13B	VAV1	FLOT2
	PSCD3	RPS6KA3	GAB1	AKT1
	PTPRC	RPS6KA2	AKT3	FLOT1
	ITPR2	NR0B2	FOXO3A	BCR
	RPS6KB1	PREX1	ITPR1	PDK1
	AKT2	LYN	PITX2	BTK
	SAG	PLCG2	PIK3CA	P101-PI3K
	CDKN2A	TEC	RPS6KA1	PHF11
	SYK	DAPP1	ITPR3	PTEN
FCER1PATHWAY	VAV1	SOS1	PRKCB1	PPP3CC
	JUN	MAPK3	CALM1	NFATC3
	PIK3R1	PLCG1	SYT1	MAP2K1
	CALM2	NFATC2	SHC1	MAP2K7
	PPP3CA	RAF1	CALM3	PPP3CB
	MAP2K4	NFATC1	FCER1A	MAP3K1
	GRB2	LYN	HRAS	PLA2G4A
	BTK	PIK3CA	NFATC4	PAK2
	MAPK1	FOS	SYK	ELK1
	MAPK8	FCER1G
ST_TYPE_I_INTERFERON_PATHWAY	STAT1	ISGF3G	STAT2	REG1A
	IFNB1	PTPRU	TYK2	IFNAR1
	JAK1
PKCPATHWAY	GNAQ	NFKBIA	NFKB1	PRKCB1
	PRKCA	RELA	PLCB1
BCRPATHWAY	VAV1	SOS1	PRKCB1	MAPK14
	RAC1	PPP3CC	MAPK3	JUN
	CALM1	NFATC3	PLCG1	SYT1
	CALM2	MAP2K1	NFATC2	SHC1
	BLNK	PPP3CA	CD79B	RAF1
	CALM3	PPP3CB	NFATC1	MAP3K1
	GRB2	LYN	PRKCA	HRAS
	BTK	CD79A	NFATC4	FOS
	SYK	ELK1	MAPK8
NDKDYNAMINPATHWAY	CALM3	PPP3CB	DNM1	EPN1
	AP2A1	PPP3CC	NME1	AP2M1
	AMPH	EPS15	CALM1	NME2
	SYNJ2	SYT1	CALM2	SYNJ1
	PICALM	BIN1	PPP3CA
regulation of nucleocytoplasmic transport	IL10	MXI1	NFKBIA	NUDT3
	NUDT4	TNFSF14
vesicle-mediated transport	ABCA1	AMPH	AP1S2	ARF3
	ARF4	ARF6	BIN1	CAV1
	CAV2	CCL5	CD14	CHGB
	CHIC2	CPNE1	CPNE3	CPNE6
	EMD	FCGR1A	FOLR1	GDI2
	GGA1	GNAS	HERC1	ITSN2
	LDLR	LRP2	LRP3	MSR1
	PIK3C3	RAB3A	RAB3D	RAB9A
	SORL1	STX18	STX6	STX7
	STX8	TNFAIP2
CXCR4PATHWAY	RAF1	PIK3C2G	CXCL12	GNAQ
	GNAI1	GNGT1	PTK2	HRAS
	PRKCB1	PRKCA	BCAR1	CXCR4
	CRK	PXN	MAPK3	RELA
	PIK3CA	PIK3R1	PLCG1	PTK2B
	NFKB1	MAPK1	GNB1	MAP2K1
EGFPATHWAY	EGFR	STAT5A	SOS1	PRKCB1
	JUN	MAPK3	PIK3R1	PLCG1
	MAP2K1	SHC1	STAT3	RAF1
	MAP2K4	RASA1	MAP3K1	SRF
	EGF	PRKCA	GRB2	HRAS
	JAK1	STAT1	PIK3CA	CSNK2A1
	FOS	ELK1	MAPK8
PDGFPATHWAY	STAT5A	SOS1	PDGFRA	PRKCB1
	JUN	MAPK3	PDGFA	PIK3R1
	PLCG1	MAP2K1	SHC1	STAT3
	RAF1	MAP2K4	RASA1	MAP3K1
	SRF	PRKCA	GRB2	HRAS
	JAK1	STAT1	PIK3CA	CSNK2A1
	FOS	ELK1	MAPK8
PLCPATHWAY	PIK3CA	PIK3R1	VAV1	PLCG1
	PRKCB1	PRKCA	AKT1	PLCB1
SPPAPATHWAY	RAF1	GNAI1	GNGT1	PTK2
	PRKCA	PRKCB1	HRAS	F2R
	PLA2G4A	MAPK3	F2RL3	F2
	PLCB1	ITGB1	TBXAS1	SRC
	PTGS1	MAPK1	GNB1	MAP2K1
	ITGA1	SYK
